# Supplementary material
Source: PubMed Central journal article supplement (PMC6425872)
Supplement: DB180882SupplementaryData.pdf [file DB180882SupplementaryData.pdf]

## SUPPLEMENTARY DATA

### Genetic contribution to the divergence in type 1 diabetes risk between children from the general population and children from affected families

Markus Hippich,<sup>1</sup> Andreas Beyerlein,<sup>1,2</sup> William A. Hagopian,<sup>3</sup> Jeffrey P. Krischer,<sup>4</sup> Kendra Vehik,<sup>4</sup> Jan Knoop,<sup>1</sup> Christiane Winker,<sup>1,5</sup> Jorma Toppari,<sup>6</sup> Åke Lernmark,<sup>7</sup> Marian J. Rewers,<sup>8</sup> Andrea K. Steck,<sup>8</sup> Jin-Xiong She,<sup>9</sup> Beena Akolkar,<sup>10</sup> Catherine C. Robertson,<sup>11</sup> Suna Onengut-Gumuscu,<sup>11</sup> Stephen S. Rich,<sup>11</sup> Ezio Bonifacio,<sup>5,12</sup> Anette-G. Ziegler,<sup>1,2,12</sup> and the TEDDY Study Group

#### *Content*

#### Supplementary Figures

**Supplementary Figure 1.** Flow chart of study population

**Supplementary Figure 2.** Incidence islet autoantibodies in FDR children compared with GP children by the age of seroconversion

**Supplementary Figure 3.** Manhattan plot of allele enrichment in FDR children

**Supplementary Figure 4.** Risk of developing islet autoantibodies and diabetes in GP children with respect to HLA *DRB1\*04:01* alleles

**Supplementary Figure 5.** Kaplan–Meier curves for the risk of islet autoantibodies and diabetes in children stratified according to *BTNL2* haplotypes

**Supplementary Figure 6.** Effect of *BTNL2* knockdown in monocyte-derived dendritic cells on CD4+ T cell activation

**Supplementary Figure 7.** Risk of developing islet autoantibodies and diabetes in FDR children and in GP children according to genetic susceptibility strata based on *BTNL2* SNP rs3763305 and genetic risk score (GRS).

**Supplementary Figure 8.** Risk of developing islet autoantibodies and diabetes in children with a mother with type 1 diabetes compared with children with a father or sibling with type 1 diabetes.

#### Supplementary Tables

**Supplementary Table 1.** Genotype frequencies for SNPs used in the T1D genetic risk score

**Supplementary Table 2.** Cox proportional hazards models for the development of islet autoantibodies and diabetes in TEDDY children with the HLA *DR3/4-DQ8* genotype

**Supplementary Table 3.** Genotype frequencies of *BTNL2* SNP rs3765503 in validation cohort

**Supplementary Table 4.** Haplotypes of 34 SNPs in *BTNL2*

**Supplementary Table 5.** Relationship between *BTNL2* SNP rs3765503 genotypes and HLA *DR3* and *DRB1\*04* subtype alleles in TEDDY children with the HLA *DR3/DR4-DQ8* genotype

**Supplementary Table 6.** Relationship between *BTNL2* rs3763305 genotypes with HLA *DRB1\*04* subtype alleles in patients from the Bavarian diabetes registry DiMelli

**Supplementary Table 7.** Cox proportional hazards models for developing islet autoantibodies and diabetes according to *BTNL2* rs3763305 genotype in children with the *DRB1\*0404* allele

**Supplementary Table 8.** Cumulative risk of developing islet autoantibodies or diabetes by 6 years old in children stratified by genetic risk score and HLA *DRB1\*04* subtype

**Supplementary Table 9.** Cox proportional hazards models for developing islet autoantibodies and diabetes in FDR children with respect to the affected family member.

#### Supplementary Acknowledgements

#### Supplementary References

SUPPLEMENTARY DATA

**Supplementary Figure 1.** Flow chart of study population

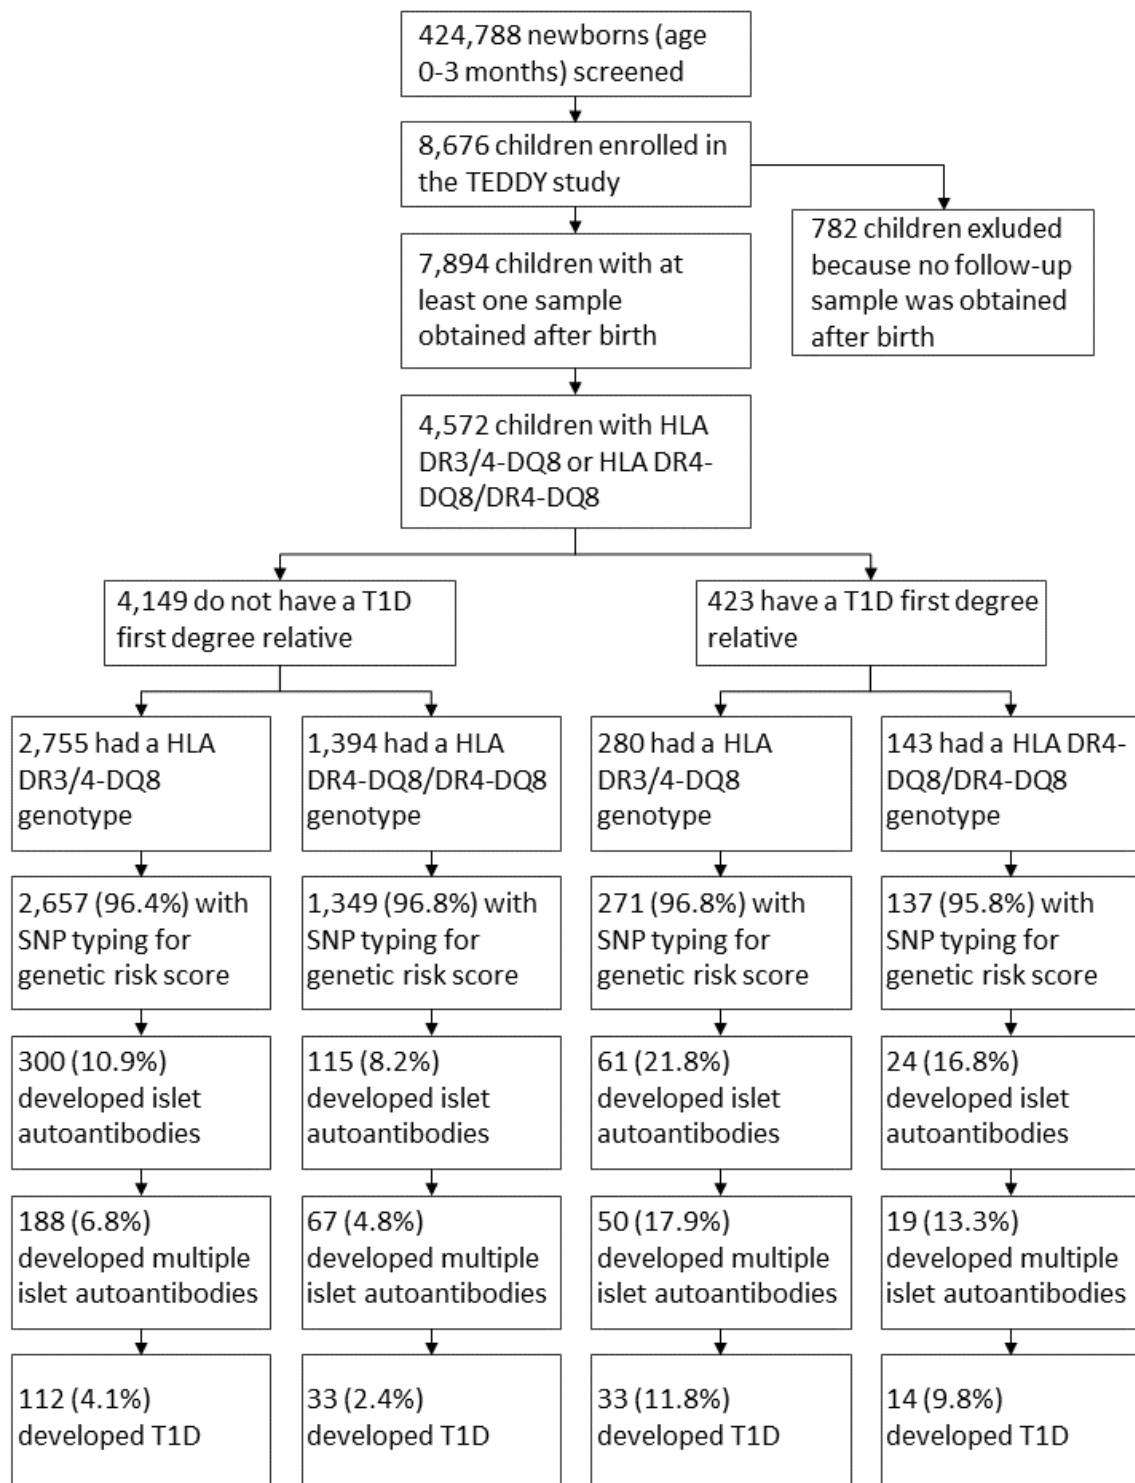

## SUPPLEMENTARY DATA

**Supplementary Figure 2.** (A) Incidence of one or more islet autoantibodies among *DR3/4-DQ8* and *DR4-DQ8/DR4-DQ8* FDR children (red) compared with GP children (blue) by the age of seroconversion. (B) Incidence of first-appearing IAA (solid lines) and first-appearing GADA (broken lines) at seroconversion in *DR3/4-DQ8* and *DR4-DQ8/DR4-DQ8* FDR children (red) compared with GP children (blue) by the age of seroconversion.

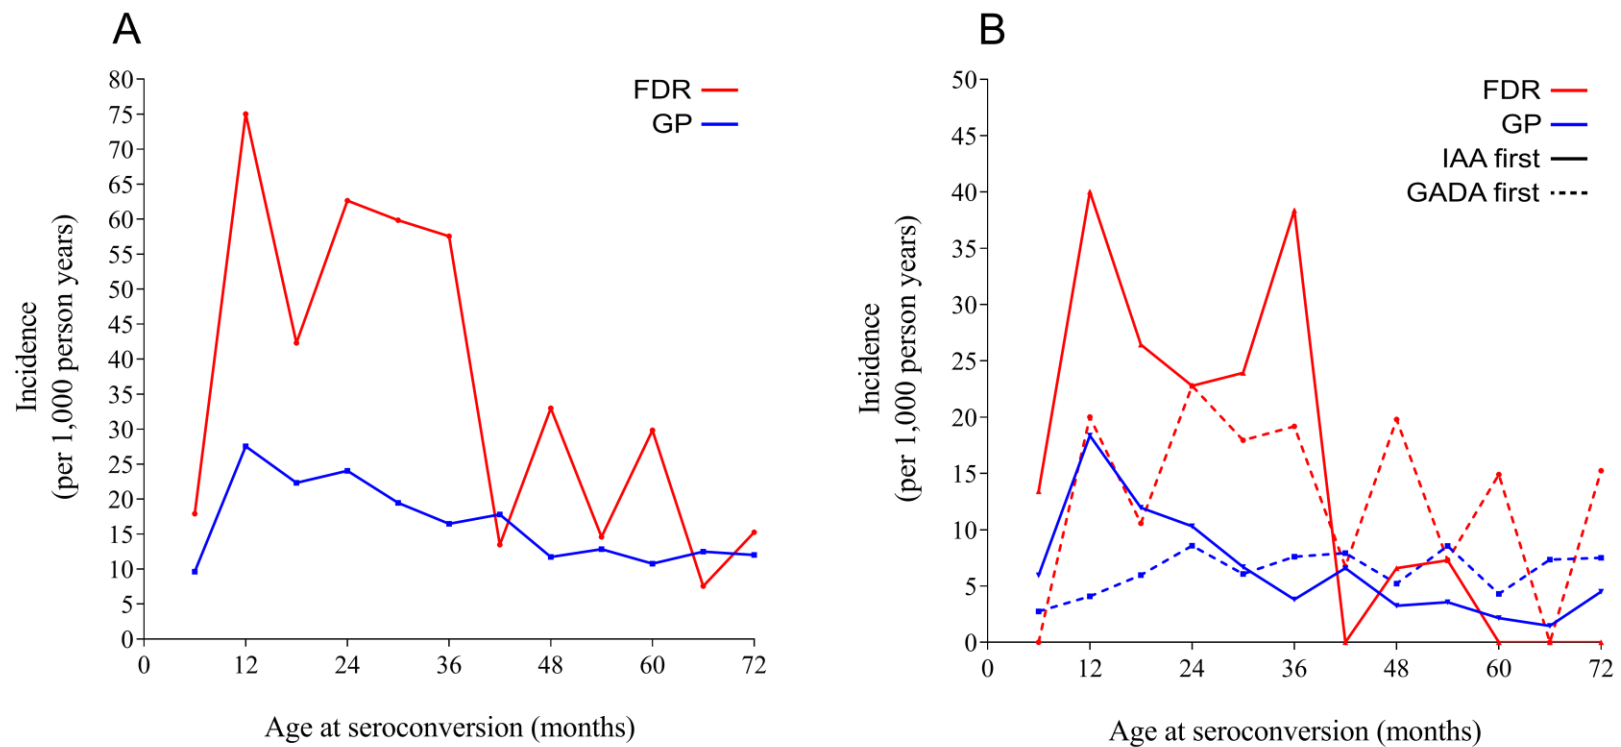

## SUPPLEMENTARY DATA

**Supplementary Figure 3.** Manhattan plot of allele enrichment in FDR children. SNPs were analyzed across the HLA region on chromosome 6 (A) and across all ImmunoChip data (B).

$P$ -values were calculated using  $\chi^2$  tests. The thresholds for  $P$ -values after Bonferroni correction ( $8.2 \times 10^{-6}$  and  $4.5 \times 10^{-7}$ ) are indicated using solid lines.

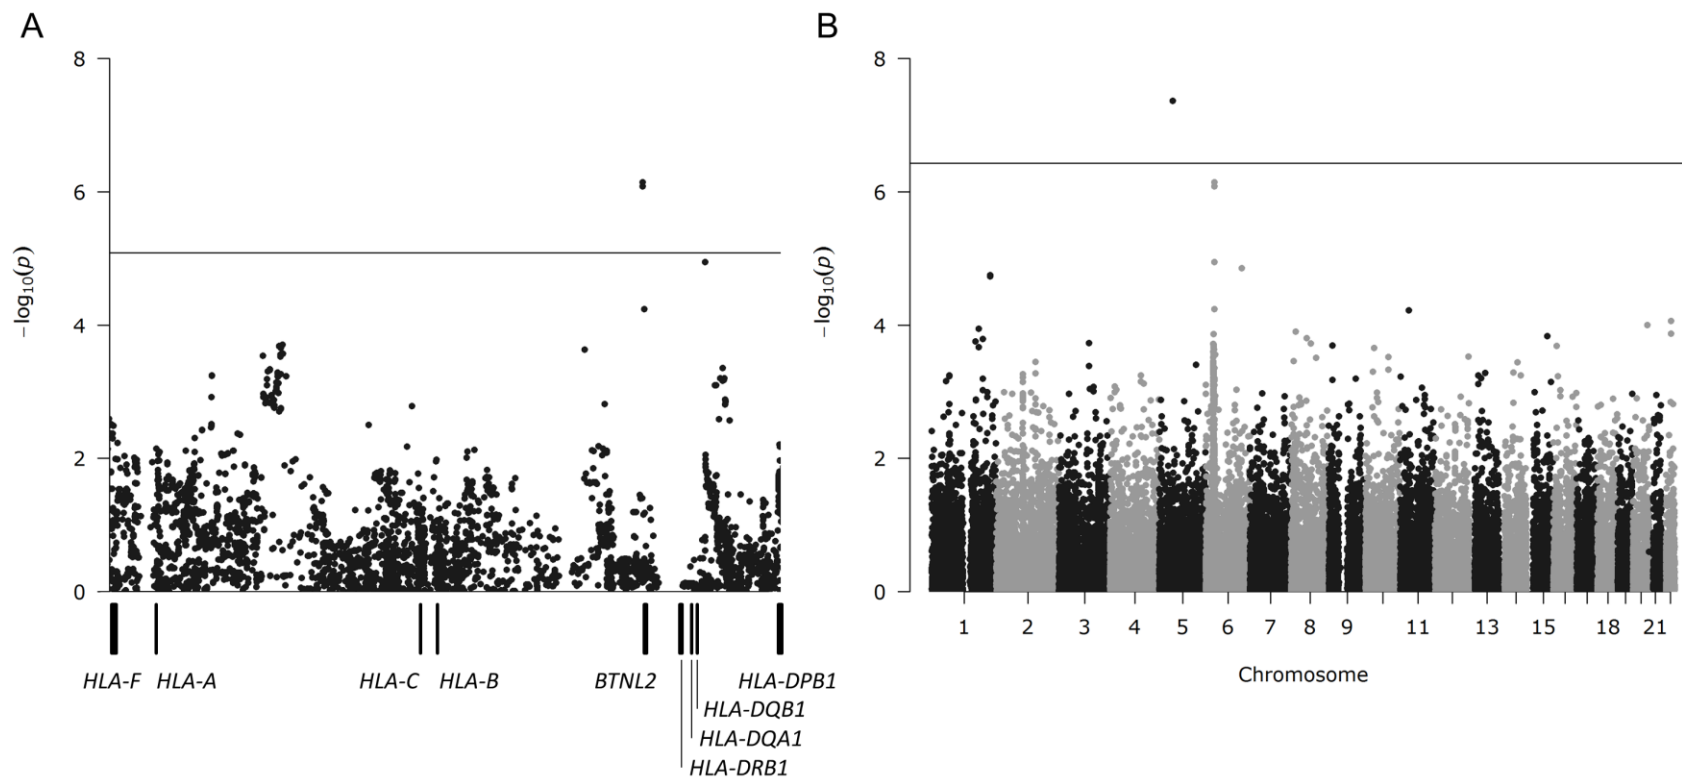

SUPPLEMENTARY DATA

**Supplementary Figure 4.** Risk of developing one or more islet autoantibodies (A, B), multiple islet autoantibodies (C, D) and diabetes (E, F) in GP children with HLA *DR3/DR1\*04:01-DQ8* or *DR1\*04:01-DQ8/DR1\*04:xx-DQ8*, where *\*04:xx* was any allele other than *DR1\*04:04* or *DR1\*04:07* (red) vs children without *DR1\*04:01* (blue). The risks are also shown separately for GP children with HLA *DR3/DR4\*04:01-DQ8* (B, D, F). *P*-values were calculated using log-rank tests.

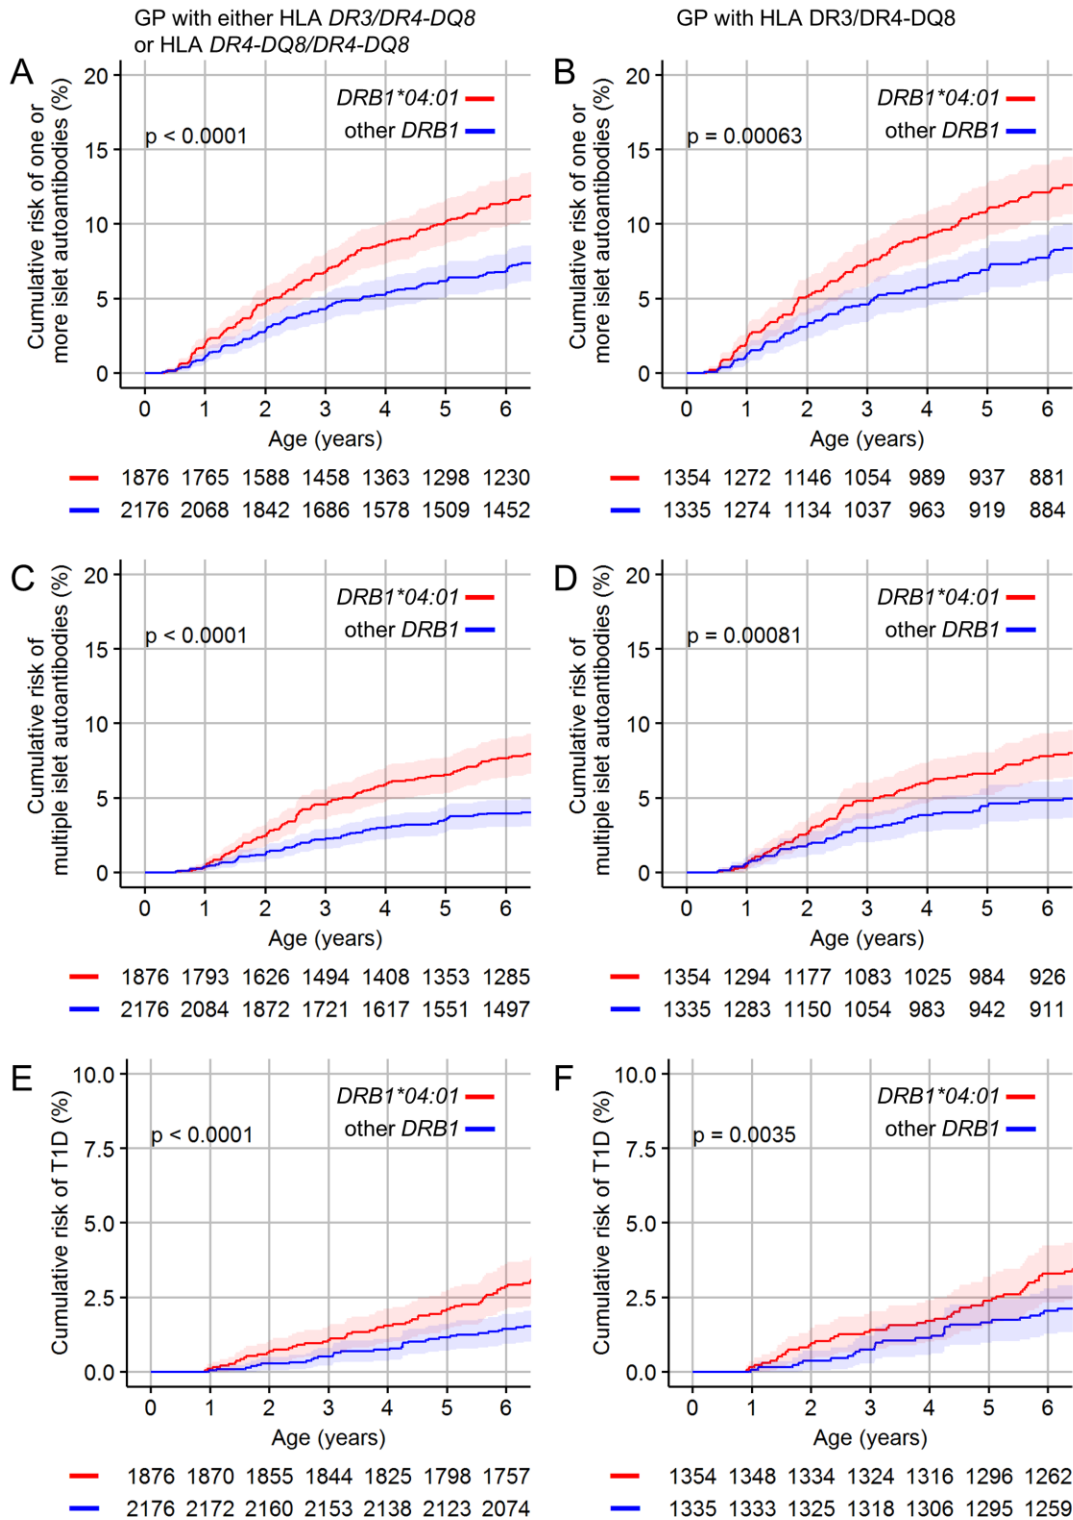

SUPPLEMENTARY DATA

**Supplementary Figure 5.** Kaplan–Meier curves for the risk of one or more islet autoantibodies (A, B), multiple islet autoantibodies (C, D), and diabetes (E, F) in GP children stratified into children with the *HLA DR3/DR4-DQ8* (A, C, E) or *HLA DR4-DQ8/DR4-DQ8* (B, D, F) genotypes and according to *BTNL2* haplotypes. For both HLA genotypes, the 4 major *BTNL2* genotypes are shown. The genotypes that include haplotype 28, which is the only *BTNL2* haplotype that has the SNP rs3763305 A allele, are indicated as thick blue lines. Shaded areas represent the 95% CI. Numbers represent children at risk. P-values were calculated using log-rank tests.

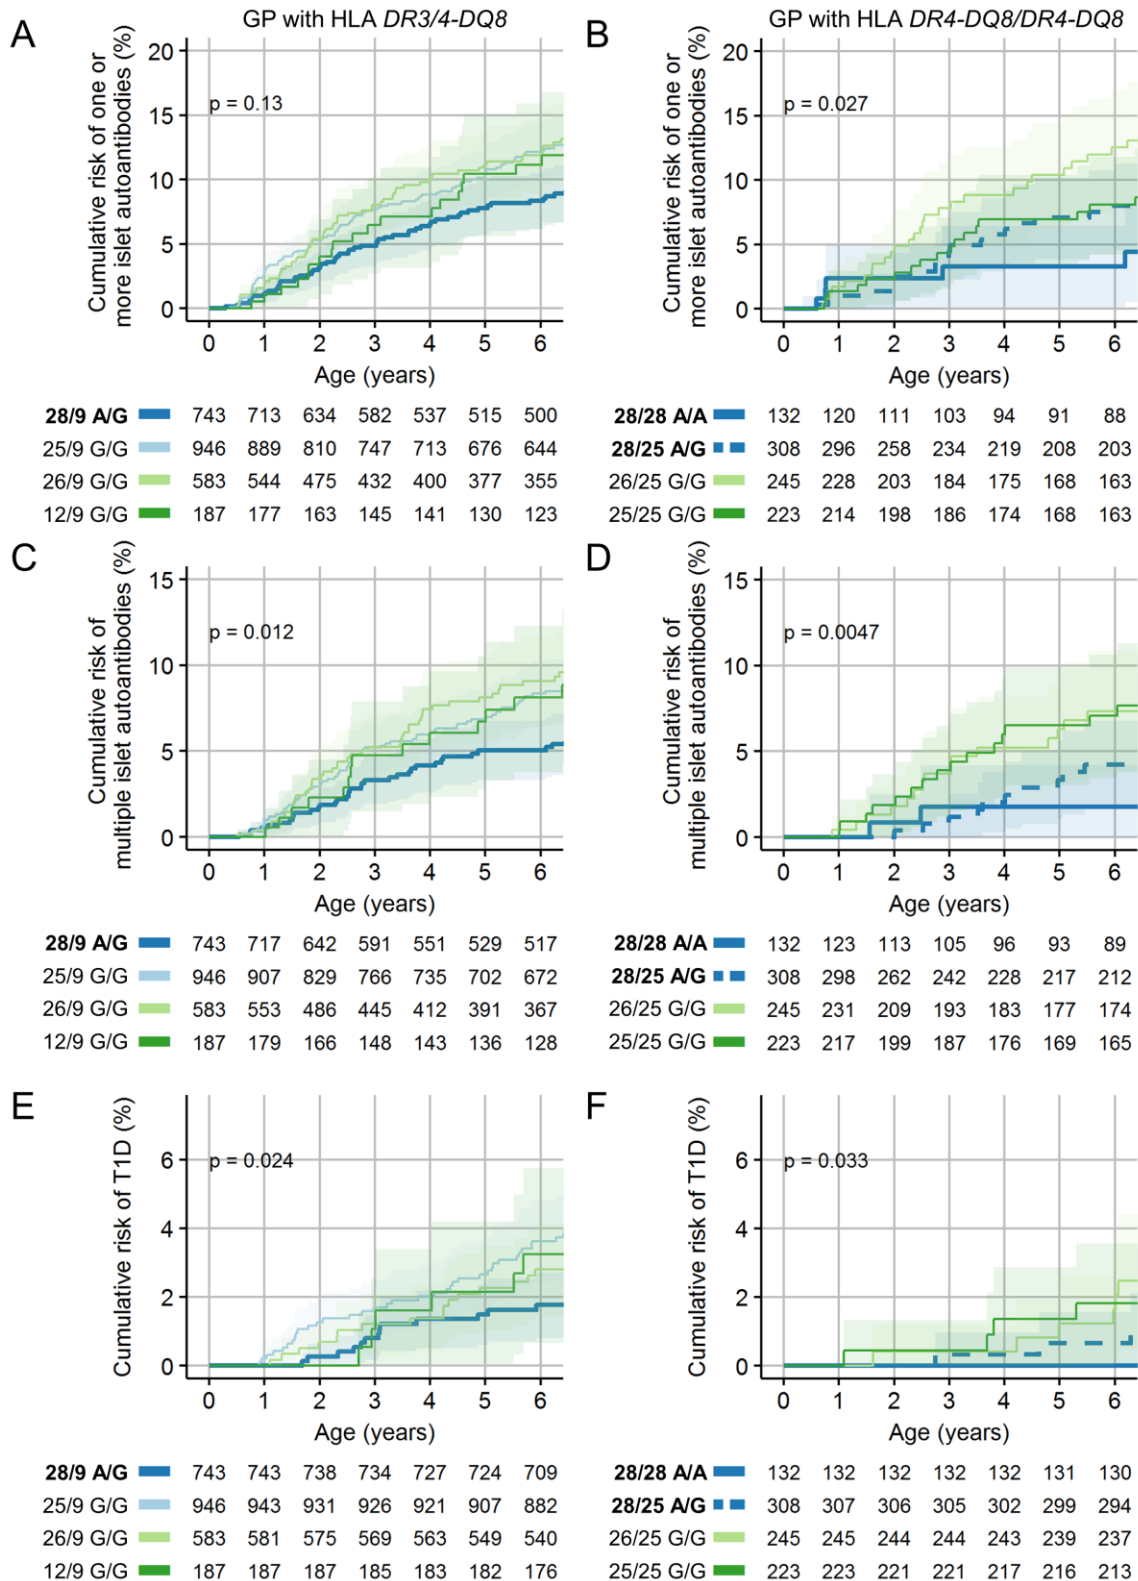

## SUPPLEMENTARY DATA

**Supplementary Figure 6.** Effect of *BTNL2* knockdown in monocyte-derived dendritic cells on CD4<sup>+</sup> T cell activation. A. Activation of isolated CD4<sup>+</sup> CD25<sup>-</sup> T cells by allogeneic monocyte-derived dendritic cells transfected with non-targeting siRNA or *BTNL2* targeting siRNA in mixed lymphocyte cultures. CD71 expression, previously reported as a marker of allo-reactive T cell activation, was used to measure the activation of the CD4<sup>+</sup> T cells. Dendritic cells were transfected as previously described (1). The upper panels are exemplary FACS plots for 42 hour cultures of CD4<sup>+</sup> T cells only and in the presence of allo-reactive transfected dendritic cells. The lower graph indicates the mean frequency CD71<sup>+</sup> CD45RA<sup>+</sup> CD4<sup>+</sup> T cells at the end of the 42 hour culture (4 replicates) after subtraction of the mean frequency of CD71<sup>+</sup> CD45RA<sup>+</sup> CD4<sup>+</sup> T cells in quadruplicate cultures without dendritic cells. Each of three dendritic cell samples was tested against two different allogeneic CD4<sup>+</sup> T cell preparation yielding 6 data sets. Activation was increased when CD4<sup>+</sup> T cells were activated with dendritic cells transfected with *BTNL2*-targeting siRNA as compared to non-targeting siRNA ( $p=0.031$ , Wilcoxon matched pair sign test). B. Activation of isolated CD4<sup>+</sup> CD25<sup>-</sup> T cells by autologous monocyte-derived dendritic cells transfected with non-targeting siRNA or *BTNL2*-targeting siRNA in the presence of flu or tetanus toxoid antigen. CD69 expression was used to measure the activation of the CD4<sup>+</sup> T cells. The upper panels are exemplary FACS plots for 42 hour cultures of CD4<sup>+</sup> T cells plus dendritic cells in the presence and absence of flu antigen. The lower graph indicates the mean frequency CD69<sup>+</sup> CD4<sup>+</sup> T cells at the end of the 42 hour culture (triplicates) after subtraction of the mean frequency of CD69<sup>+</sup> CD4<sup>+</sup> T cells in triplicates cultures without antigen. Each of three dendritic cell samples was tested against flu and tetanus toxoid yielding 6 data sets. Activation was not different when CD4<sup>+</sup> T cells were activated with dendritic cells transfected with *BTNL2*-targeting siRNA as compared to non-targeting siRNA ( $p=0.43$ , Wilcoxon matched pair sign test). C. Efficiency of knockdown with *BTNL2* vs non-targeting siRNA in dendritic cells used for A and B. 200ng of RNA from siRNA transfected cells was subjected to cDNA synthesis using a mix of oligo-dT-primer and random primer with the iScript cDNA synthesis Kit (Bio-Rad) followed by pre-amplification with gene specific primers and the SsoAdvanced PreAmp Supermix (Bio-Rad). qbase+-software (Biogazelle) was used for analysis of qPCR experiments. *BTNL2* expression was normalized to reference genes *TELO2* and *TRMT61A* and the Calibrated Normalized Relative Quantities (CNRQ) relative to the treatment with non-targeting siRNA is shown ( $p=0.033$ ).

**A CD45RA<sup>+</sup> CD4<sup>+</sup> T cell response to allogenic stimulus**

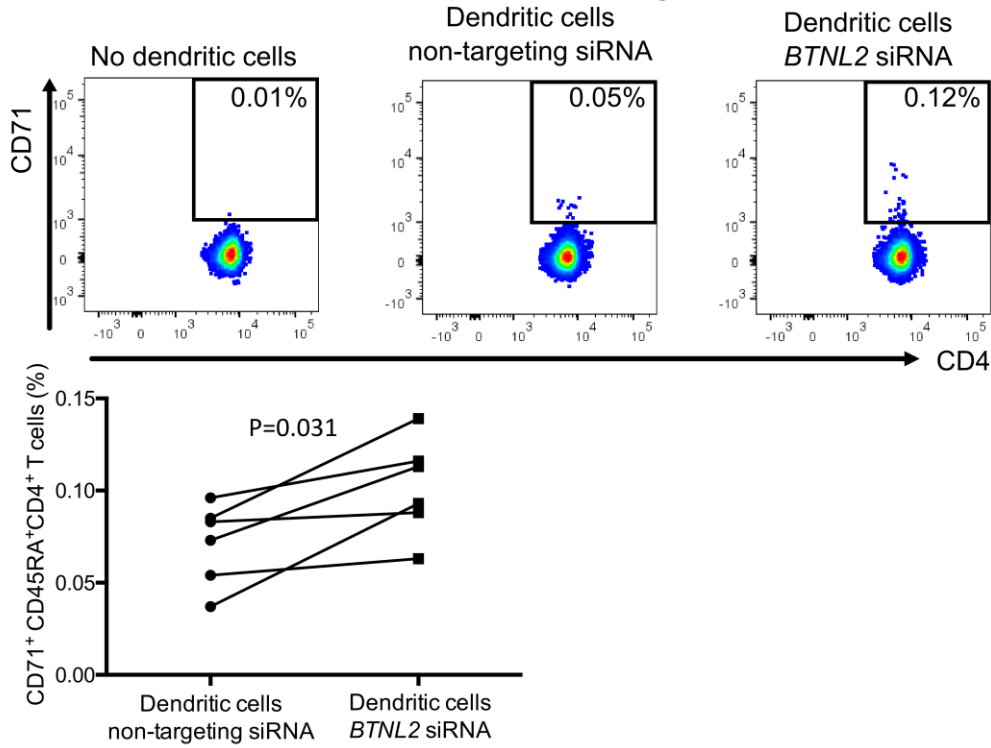

**B CD45RO<sup>+</sup> CD4<sup>+</sup> T cell response to recall antigen stimulus**

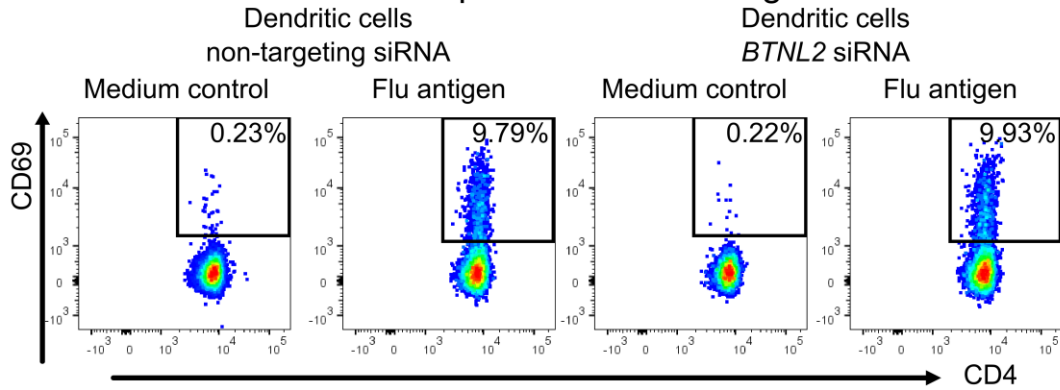

**C Efficiency of *BTNL2* knockdown**

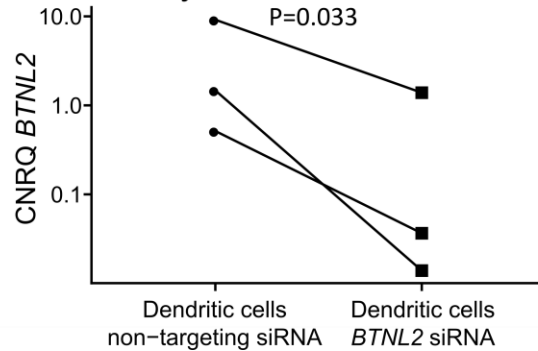



SUPPLEMENTARY DATA

**Supplementary Figure 7.** Risk of developing islet autoantibodies and diabetes in FDR children (B, D, F) and in GP children (A, B, C) according to genetic susceptibility strata based on *BTNL2* SNP rs3763305 and genetic risk score (GRS). Risks are shown for the development of one or more islet autoantibodies (A, B), multiple islet autoantibodies (C, D), and diabetes (E, F). All of the children had the *DR3/DR4-DQ8* or *DR4-DQ8/DR4-DQ8* genotype. Genetic susceptibility strata were defined as follows: 1. rs3763305 GG AND GRS in the upper quartile (red); 2. rs3763305 GG AND GRS in the second quartile, OR rs3763305 GA or AA AND GRS in the upper quartile (grey); 3. rs3763305 GG AND GRS in the lower 50<sup>th</sup> centile OR rs3763305 GA or AA AND GRS in the second quartile (green); and 4. rs3763305 GA or AA AND GRS in the lower 50<sup>th</sup> centile (blue). *P*-values were calculated across all strata using log-rank tests.

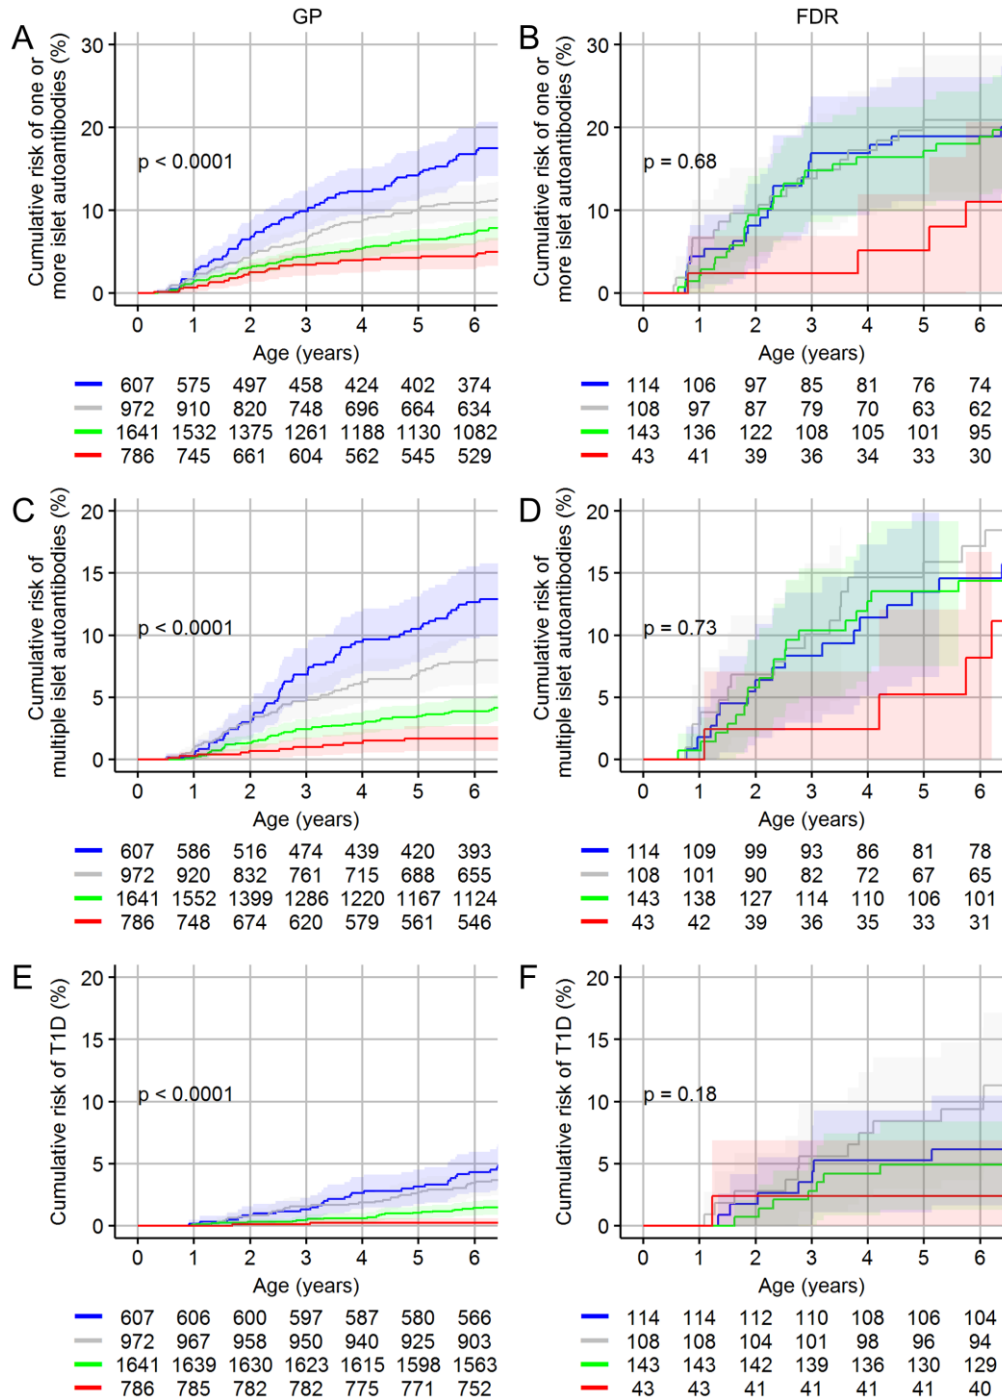

SUPPLEMENTARY DATA

**Supplementary Figure 8.** Risk of developing one or more islet autoantibodies (A, D, G, J), multiple islet autoantibodies (B, E, H, K) and diabetes (C, F, I, L) in children with a mother with T1D (red) compared with children with a father or sibling with T1D (blue). Children have been stratified by genetic risk score and HLA *DRB1\*04* subtype into four risk strata from highest genetic susceptibility (A, B, C), to the lowest genetic susceptibility (J, K, L). *P*-values were calculated using log-rank tests.

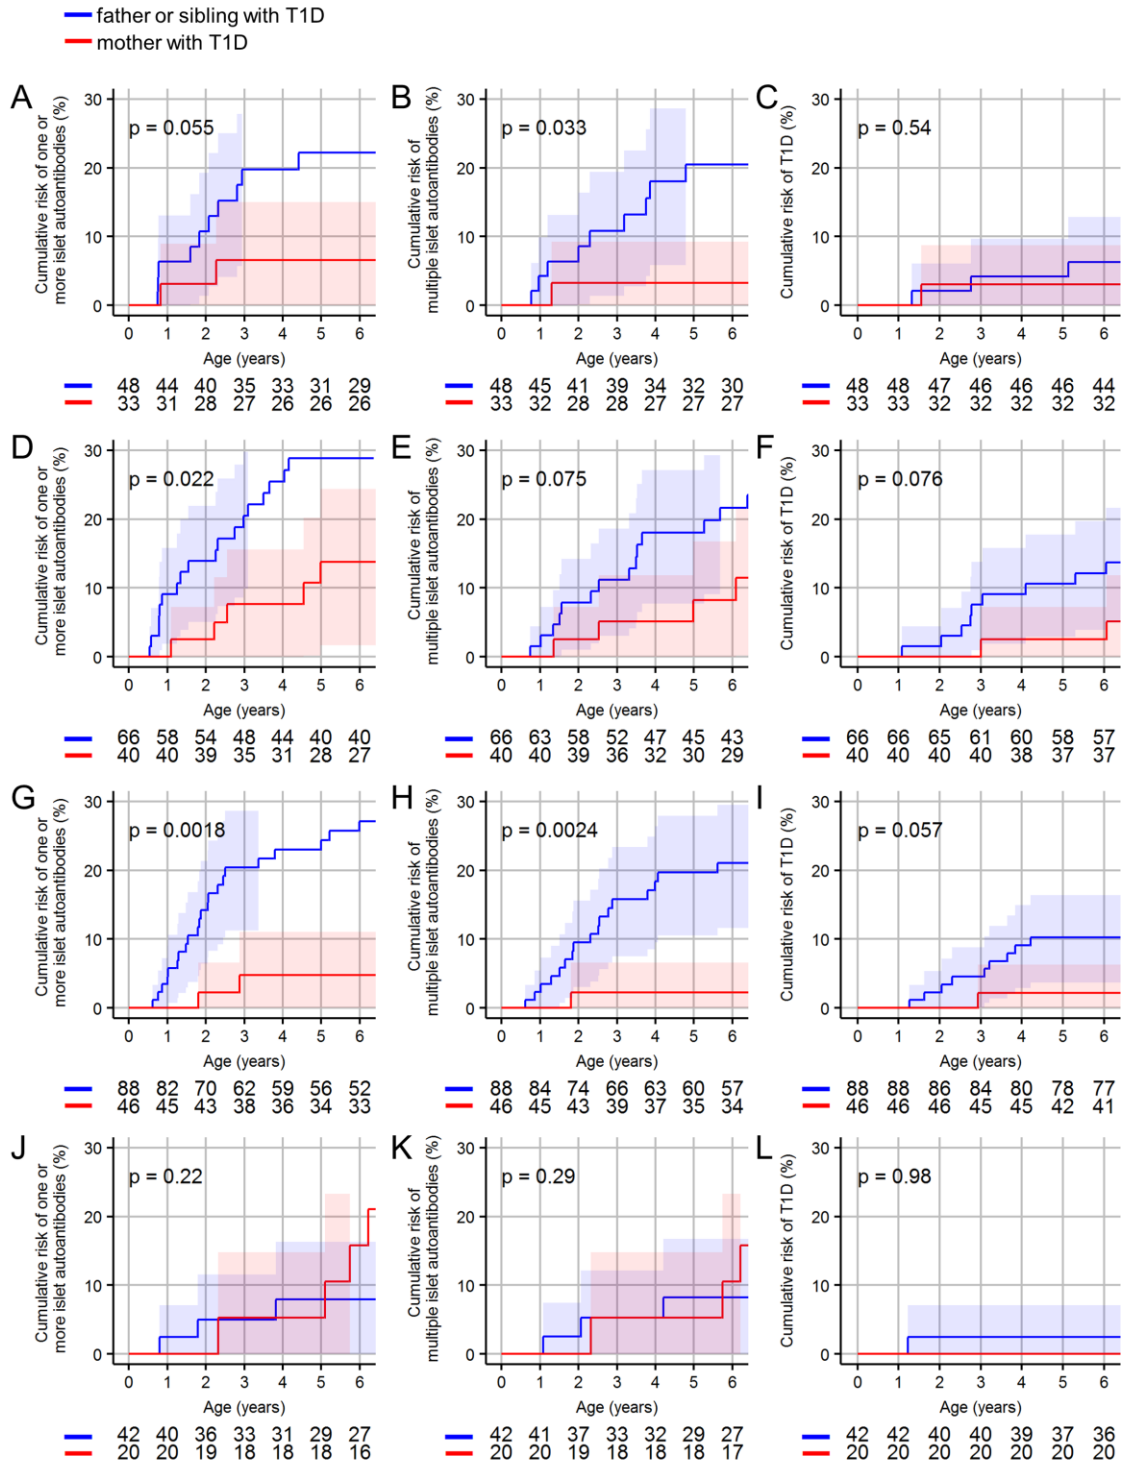

SUPPLEMENTARY DATA

**Supplementary Table 1.** Genotype frequencies for SNPs used in the genetic risk score in FDR children and in GP children

| SNP        | Gene              | Genotype frequency [%] * |      |      |             |      |      | P-value |
|------------|-------------------|--------------------------|------|------|-------------|------|------|---------|
|            |                   | FDR children             |      |      | GP children |      |      |         |
|            |                   | PP                       | SP   | SS   | PP          | SP   | SS   |         |
| rs6897932  | <i>IL7R</i>       | 11.8                     | 34.5 | 53.7 | 7.7         | 41.0 | 51.3 | 0.0020  |
| rs1004446  | <i>INS</i>        | 9.0                      | 44.7 | 46.3 | 14.4        | 45.6 | 40.0 | 0.0025  |
| rs3825932  | <i>CTSH</i>       | 10.9                     | 40.0 | 49.2 | 13.9        | 44.1 | 42.1 | 0.014   |
| rs3024505  | <i>IL10</i>       | 2.4                      | 20.9 | 76.8 | 2.2         | 27.0 | 70.8 | 0.025   |
| rs3184504  | <i>SH2B3</i>      | 27.4                     | 46.8 | 25.8 | 30.9        | 48.8 | 20.3 | 0.027   |
| rs2292239  | <i>ERBB3</i>      | 42.8                     | 44.0 | 13.2 | 46.4        | 44.1 | 9.6  | 0.043   |
| rs1990760  | <i>IFIH1</i>      | 13.5                     | 50.1 | 36.3 | 18.3        | 47.4 | 34.3 | 0.053   |
| rs10517086 | <i>Unknown</i>    | 46.8                     | 46.6 | 6.6  | 51.4        | 40.7 | 7.9  | 0.058   |
| rs229541   | <i>IL2B</i>       | 29.8                     | 49.4 | 20.8 | 34.5        | 48.3 | 17.2 | 0.064   |
| rs7804356  | <i>SCAP2</i>      | 3.3                      | 34.0 | 62.6 | 5.7         | 35.2 | 59.1 | 0.079   |
| rs2069763  | <i>IL2</i>        | 35.5                     | 51.1 | 13.5 | 39.4        | 45.5 | 15.1 | 0.088   |
| rs3757247  | <i>BACH2</i>      | 28.9                     | 48.6 | 22.5 | 33.2        | 47.7 | 19.1 | 0.10    |
| rs4948088  | <i>COBL</i>       | 0.2                      | 5.9  | 93.9 | 0.3         | 8.8  | 90.9 | 0.12    |
| rs7020673  | <i>GLIS3</i>      | 21.7                     | 47.3 | 31.0 | 24.4        | 49.0 | 26.5 | 0.12    |
| rs2476601  | <i>PTPN22</i>     | 76.1                     | 22.5 | 1.4  | 80.3        | 18.6 | 1.1  | 0.12    |
| rs2816316  | <i>RGS1</i>       | 5.0                      | 29.6 | 65.5 | 3.3         | 30.4 | 66.3 | 0.20    |
| rs9388489  | <i>C6ORF</i>      | 26.7                     | 51.8 | 21.5 | 29.7        | 47.6 | 22.7 | 0.25    |
| rs425105   | <i>PRKD2</i>      | 1.4                      | 28.6 | 70.0 | 2.7         | 27.1 | 70.2 | 0.26    |
| rs45450798 | <i>PTPN2</i>      | 66.7                     | 29.3 | 4.0  | 69.6        | 27.5 | 2.9  | 0.26    |
| rs5753037  | <i>Unknown</i>    | 42.8                     | 43.3 | 13.9 | 40.6        | 47.2 | 12.2 | 0.27    |
| rs3087243  | <i>CTLA4</i>      | 14.7                     | 47.8 | 37.6 | 17.5        | 47.0 | 35.5 | 0.31    |
| rs2395029  | <i>HLA_B_5701</i> | 0.0                      | 1.2  | 98.8 | 0.0         | 2.2  | 97.7 | 0.32    |
| rs17574546 | <i>Unknown</i>    | 61.6                     | 33.4 | 5.0  | 64.3        | 31.8 | 3.9  | 0.41    |
| rs2281808  | <i>SIRPG</i>      | 9.7                      | 46.0 | 44.3 | 11.8        | 44.5 | 43.7 | 0.43    |
| rs1465788  | <i>ZFP36L1</i>    | 7.1                      | 44.4 | 48.5 | 7.9         | 41.2 | 50.9 | 0.43    |
| rs3788013  | <i>UBASH3A</i>    | 35.9                     | 50.1 | 13.9 | 35.0        | 48.6 | 16.4 | 0.44    |
| rs4788084  | <i>IL27</i>       | 17.5                     | 47.8 | 34.8 | 19.4        | 48.3 | 32.3 | 0.50    |
| rs763361   | <i>CD226</i>      | 26.0                     | 48.7 | 25.3 | 27.1        | 49.8 | 23.0 | 0.57    |
| rs6920220  | <i>TNFAIP3</i>    | 64.5                     | 30.5 | 5.0  | 63.6        | 32.0 | 4.4  | 0.73    |
| rs1738074  | <i>TAGAP</i>      | 19.9                     | 46.3 | 33.8 | 18.6        | 48.0 | 33.4 | 0.76    |
| rs12708716 | <i>CLEC16A</i>    | 12.6                     | 42.2 | 45.3 | 12.2        | 44.0 | 43.8 | 0.76    |
| rs7221109  | <i>unknown</i>    | 13.9                     | 44.2 | 41.8 | 13.6        | 45.9 | 40.4 | 0.79    |
| rs2664170  | <i>GAB3</i>       | 56.5                     | 22.7 | 20.8 | 57.6        | 21.4 | 20.9 | 0.83    |
| rs4763879  | <i>CD69</i>       | 37.7                     | 49.1 | 13.3 | 38.9        | 47.7 | 13.4 | 0.86    |
| rs947474   | <i>PRKCQ</i>      | 3.5                      | 30.5 | 66.0 | 3.2         | 30.1 | 66.8 | 0.89    |
| rs5979785  | <i>TLR8</i>       | 17.5                     | 18.4 | 64.1 | 18.2        | 18.5 | 63.3 | 0.92    |
| rs7202877  | <i>unknown</i>    | 79.7                     | 19.1 | 1.2  | 79.1        | 19.5 | 1.3  | 0.95    |
| rs1264813  | <i>HLA_A_24</i>   | 82.7                     | 16.6 | 0.7  | 82.3        | 17.0 | 0.7  | 0.98    |

SUPPLEMENTARY DATA

|            |                 |     |      |      |     |      |      |      |
|------------|-----------------|-----|------|------|-----|------|------|------|
| rs10509540 | <i>C10orf59</i> | 7.1 | 38.3 | 54.6 | 7.3 | 38.3 | 54.4 | 0.98 |
| rs12722495 | <i>IL2R</i>     | 0.7 | 16.5 | 82.7 | 0.7 | 16.6 | 82.7 | 1.00 |

---

\* P refers to the protective allele and S refers to the susceptible allele

SUPPLEMENTARY DATA

**Supplementary Table 2.** Cox proportional hazards models for the development of islet autoantibodies and diabetes in FDR children compared with GP children in TEDDY children with the HLA *DR3/4-DQ8* genotype

| Variable                    | One or more islet autoantibodies |         |             |         | Multiple islet autoantibodies |         |             |         | Diabetes    |         |             |         |
|-----------------------------|----------------------------------|---------|-------------|---------|-------------------------------|---------|-------------|---------|-------------|---------|-------------|---------|
|                             | Model 1 *                        |         | Model 2 *   |         | Model 1 *                     |         | Model 2 *   |         | Model 1 *   |         | Model 2 *   |         |
|                             | HR                               | P-value | HR          | P-value | HR                            | P-value | HR          | P-value | HR          | P-value | HR          | P-value |
|                             | (95% CI)                         |         | (95% CI)    |         | (95% CI)                      |         | (95% CI)    |         | (95% CI)    |         | (95% CI)    |         |
| First-degree relative       | 2.24                             | <0.0001 | 1.95        | <0.0001 | 2.92                          | <0.0001 | 2.47        | <0.0001 | 3.48        | <0.0001 | 2.86        | <0.0001 |
|                             | (1.67–3.01)                      |         | (1.45–2.63) |         | (2.09–4.07)                   |         | (1.76–3.46) |         | (2.30–5.28) |         | (1.88–4.36) |         |
| <i>DRB1</i> *0401/x †       |                                  |         | 1.26        | 0.11    |                               |         | 1.24        | 0.22    |             |         | 1.17        | 0.47    |
|                             |                                  |         | (0.95–1.68) |         |                               |         | (0.88–1.74) |         |             |         | (0.76–1.79) |         |
| Genetic risk score ‡        |                                  |         | 1.50        | <0.0001 |                               |         | 1.63        | <0.0001 |             |         | 1.56        | <0.0001 |
|                             |                                  |         | (1.33–1.68) |         |                               |         | (1.41–1.88) |         |             |         | (1.29–1.87) |         |
| <i>BTNL2</i> rs3763305 GG § |                                  |         | 1.09        | 0.60    |                               |         | 1.43        | 0.090   |             |         | 1.92        | 0.021   |
|                             |                                  |         | (0.79–1.51) |         |                               |         | (0.95–2.17) |         |             |         | (1.11–3.35) |         |
| <i>ITGA1</i> rs7735139 GG § |                                  |         | 1.26        | 0.20    |                               |         | 1.14        | 0.56    |             |         | 1.25        | 0.43    |
|                             |                                  |         | (0.88–1.82) |         |                               |         | (0.73–1.80) |         |             |         | (0.72–2.18) |         |

\* Model 1 and 2 are adjusted for sex, country (reference: US) and HLA genotype; † reference: *DRB1* without 0401 or 0401/0404 and 0401/0407; ‡ per unit increase; § reference: GA/AA genotype

SUPPLEMENTARY DATA

**Supplementary Table 3.** Genotype frequencies of *BTNL2* SNP rs3765503 in validation cohort

|          | BTNL2 rs3765503 genotype |           |        | P-value* |
|----------|--------------------------|-----------|--------|----------|
|          | GG                       | AG        | AA     |          |
| Control  | 487 (71%)                | 200 (29%) | 0 (0%) | <0.0001  |
| Diabetes | 3496 (81%)               | 842 (19%) | 0 (0%) |          |

\* P-value was calculated using Fisher's exact test.

The validation cohort consists of 5,025 Caucasian subjects with European decent and HLA *DR3/4-DQ8* genotype according to the algorithm defined by Barker et al. (2), which is based on the tag SNPs rs7454108 and rs2040410. Samples were genotyped on the Illumina ImmunoChip array and imputed to the TOPMed Reference Panel. rs3763305 was directly genotyped on the ImmunoChip. rs2040410, and rs7454108 were imputed with high confidence ( $R^2 > 0.99$ ). Principal components were generated by calculating PC axes in unrelated controls using a set of 83,458 LD-pruned variants and projecting the remaining samples onto this PC space. A set of 33,249 European ancestry unrelated case-control subjects were identified for analysis by comparing PCs to 1000 Genomes Phase 3 subjects (3). We ensured samples were unrelated (less than second degree relationship) using KING version 2.13 (<http://people.virginia.edu/~wc9c/KING/>). 5,025 of these samples have the HLA *DR3/4-DQ8* genotype.

SUPPLEMENTARY DATA

**Supplementary Table 4.** Haplotypes of 34 SNPs in *BTNL2* and their frequencies in HLA *DR3/4-DQ8* and *DR4-DQ8/DR4-DQ8*. SNPs in bold are those that were identified as enriched within FDR children. Haplotype ID ‘X’ indicates that they are not among the 30 most frequent haplotypes.

| frequency [%]<br>in |       | Haplotype ID | rs3817969 | rs3129953 | rs28362678 | rs2076530 | rs9268480 | rs2076529 | rs9268481 | rs3129954 | rs3129955 | rs4248166 | rs2294884 | rs2294883 | rs2294882 | rs2294881 | rs2294880 | rs9268482 | rs2294878 | rs3817966 | <b>rs3817964</b> | rs3817963 | rs3817962 | <b>rs3763305</b> | rs2076525 | rs2076523 | rs2076522 | rs3793127 | rs10947260 | rs10947261 | rs10947262 | rs3806155 | rs3806156 | rs3806157 | rs2395158 | rs3763307 |   |   |
|---------------------|-------|--------------|-----------|-----------|------------|-----------|-----------|-----------|-----------|-----------|-----------|-----------|-----------|-----------|-----------|-----------|-----------|-----------|-----------|-----------|------------------|-----------|-----------|------------------|-----------|-----------|-----------|-----------|------------|------------|------------|-----------|-----------|-----------|-----------|-----------|---|---|
| 42.82               | 0.26  | 9            | G         | A         | G          | A         | G         | A         | A         | G         | G         | A         | A         | T         | A         | A         | A         | A         | C         | A         | A                | A         | C         | G                | A         | A         | C         | G         | A          | C          | G          | T         | C         | A         | G         | T         |   |   |
| 18.12               | 18.70 | 25           | G         | G         | G          | G         | A         | G         | G         | G         | G         | A         | A         | T         | A         | A         | G         | T         | A         | G         | A                | G         | A         | G                | G         | G         | G         | A         | A          | C          | G          | A         | A         | C         | A         | A         | A |   |
| 15.14               | 14.62 | 28           | G         | G         | G          | G         | A         | G         | G         | G         | G         | A         | A         | T         | A         | A         | G         | T         | A         | G         | <b>T</b>         | G         | A         | <b>A</b>         | G         | G         | G         | A         | A          | C          | G          | T         | A         | C         | A         | A         | A |   |
| 12.48               | 12.29 | 26           | G         | G         | G          | G         | A         | G         | G         | G         | G         | A         | A         | T         | A         | A         | G         | T         | A         | G         | A                | G         | A         | G                | G         | G         | G         | A         | A          | C          | G          | T         | A         | C         | A         | A         | A |   |
| 9.86                | 3.56  | 12           | G         | G         | G          | A         | G         | A         | A         | A         | A         | A         | A         | T         | A         | A         | A         | A         | C         | A         | A                | A         | C         | G                | A         | A         | C         | G         | A          | C          | G          | T         | C         | A         | A         | T         | A |   |
| 0.60                | 0.09  | 27           | G         | G         | G          | G         | A         | G         | G         | G         | G         | A         | A         | T         | A         | A         | G         | T         | A         | G         | A                | G         | A         | G                | G         | G         | G         | G         | A          | C          | G          | T         | A         | C         | A         | A         | A |   |
| 0.31                | 0.27  | 16           | G         | G         | G          | A         | G         | A         | A         | G         | G         | A         | A         | T         | A         | A         | A         | A         | C         | A         | A                | A         | C         | G                | A         | A         | C         | G         | A          | C          | G          | T         | C         | A         | A         | T         | A |   |
| 0.26                | 0.07  | 5            | A         | G         | A          | G         | G         | G         | A         | G         | G         | G         | C         | A         | G         | G         | A         | A         | A         | A         | A                | A         | C         | G                | A         | G         | C         | G         | G          | A          | A          | T         | A         | C         | A         | T         | A |   |
| 0.15                | 0.10  | 21           | G         | G         | G          | A         | G         | A         | A         | G         | G         | G         | C         | A         | G         | G         | A         | A         | A         | A         | A                | A         | C         | G                | A         | G         | C         | G         | G          | A          | A          | T         | A         | C         | A         | T         | A |   |
| 0.09                | 0.03  | 4            | A         | G         | A          | G         | G         | G         | A         | G         | G         | G         | C         | A         | G         | G         | A         | A         | A         | A         | A                | A         | C         | G                | A         | A         | C         | G         | A          | C          | G          | T         | C         | A         | A         | T         | A |   |
| 0.05                | 0.03  | 23           | G         | G         | G          | G         | A         | G         | G         | G         | G         | A         | A         | T         | A         | A         | A         | T         | A         | G         | A                | G         | A         | G                | G         | G         | G         | A         | A          | C          | G          | T         | A         | C         | A         | A         | A |   |
| 0.00                | 0.07  | 3            | A         | G         | A          | G         | G         | G         | A         | G         | G         | A         | A         | A         | G         | G         | G         | A         | C         | G         | A                | G         | C         | G                | A         | G         | C         | G         | A          | A          | A          | T         | A         | A         | A         | T         | A |   |
| 0.03                | 0.00  | 8            | G         | A         | G          | A         | G         | A         | A         | G         | G         | A         | A         | T         | A         | A         | A         | A         | C         | A         | A                | A         | C         | G                | A         | A         | C         | G         | A          | C          | G          | T         | C         | A         | A         | T         | A |   |
| 0.03                | 0.00  | 13           | G         | G         | G          | A         | G         | A         | A         | A         | A         | A         | A         | T         | G         | G         | A         | A         | A         | A         | A                | A         | C         | G                | A         | G         | C         | G         | G          | A          | A          | T         | A         | C         | A         | T         | A |   |
| 0.02                | 0.00  | 17           | G         | G         | G          | A         | G         | A         | A         | G         | G         | A         | A         | T         | A         | A         | A         | A         | C         | A         | A                | A         | C         | G                | A         | A         | C         | G         | A          | C          | G          | T         | C         | A         | G         | T         | A |   |
| 0.00                | 0.00  | 1            | A         | A         | A          | G         | G         | G         | A         | G         | G         | G         | C         | A         | G         | G         | A         | A         | A         | A         | A                | A         | C         | G                | A         | G         | C         | G         | G          | A          | A          | T         | A         | C         | A         | T         | A |   |
| 0.02                | 0.00  | 6            | A         | G         | G          | G         | G         | G         | A         | G         | G         | G         | A         | A         | G         | G         | G         | A         | C         | G         | A                | A         | A         | G                | A         | G         | C         | G         | G          | C          | A          | T         | A         | A         | A         | T         | A |   |
| 0.00                | 0.02  | 10           | G         | A         | G          | A         | G         | A         | A         | G         | G         | A         | A         | T         | G         | G         | A         | A         | A         | A         | <b>T</b>         | A         | C         | <b>A</b>         | A         | G         | C         | G         | A          | A          | T          | A         | C         | A         | T         | A         | A |   |
| 0.02                | 0.00  | 11           | G         | A         | G          | G         | A         | G         | G         | G         | G         | A         | A         | T         | A         | A         | G         | T         | A         | G         | <b>T</b>         | G         | A         | <b>A</b>         | G         | G         | G         | A         | A          | C          | G          | T         | A         | C         | A         | A         | A | A |
| 0.00                | 0.00  | 14           | G         | G         | G          | A         | G         | A         | A         | A         | G         | A         | A         | T         | A         | A         | A         | A         | C         | A         | A                | A         | C         | G                | A         | A         | C         | G         | A          | C          | G          | T         | C         | A         | G         | T         | A |   |
| 0.00                | 0.00  | 15           | G         | G         | G          | A         | G         | A         | A         | G         | A         | A         | A         | T         | A         | A         | A         | A         | C         | A         | A                | A         | C         | G                | A         | A         | C         | G         | A          | C          | G          | T         | C         | A         | A         | T         | A |   |
| 0.00                | 0.02  | 24           | G         | G         | G          | G         | A         | G         | G         | G         | G         | A         | A         | T         | A         | A         | G         | T         | A         | G         | A                | G         | A         | G                | G         | G         | G         | A         | A          | C          | A          | T         | A         | C         | A         | A         | A | A |
| 0.00                | 0.00  | x            | G         | A         | G          | A         | G         | A         | A         | G         | G         | A         | A         | T         | G         | G         | A         | A         | A         | A         | A                | A         | C         | G                | A         | G         | C         | G         | G          | A          | A          | T         | A         | C         | A         | T         | A |   |
| 0.00                | 0.00  | x            | G         | G         | G          | A         | G         | A         | A         | G         | G         | G         | C         | A         | G         | G         | A         | A         | A         | A         | <b>T</b>         | A         | C         | <b>A</b>         | A         | G         | C         | A         | G          | A          | A          | T         | A         | C         | A         | T         | A |   |

SUPPLEMENTARY DATA

**Supplementary Table 5.** Relationship between *BTNL2* SNP rs3765503 genotypes and HLA *DR3* and *DRB1\*04* subtypes in children with the HLA *DR3/DR4-DQ8* genotype

| HLA <i>DR</i> genotype | <i>BTNL2</i> rs3763305 genotype |             |              | Allele frequency (%) |       |
|------------------------|---------------------------------|-------------|--------------|----------------------|-------|
|                        | AA                              | GA          | GG           | A                    | G     |
| <i>DR3/DR3</i>         | 2 (0.1%)                        | 9 (0.6%)    | 1608 (99.3%) | 0.4                  | 99.6  |
| <i>DR3/DRB1*04:01</i>  | 0 (0.0%)                        | 15 (1.0%)   | 1496 (99.0%) | 0.5                  | 99.5  |
| <i>DR3/DRB1*04:02</i>  | 0 (0.0%)                        | 2 (1.2%)    | 165 (98.8%)  | 0.6                  | 99.4  |
| <i>DR3/DRB1*04:04</i>  | 1 (0.1%)                        | 837 (78.1%) | 233 (21.8%)  | 39.2                 | 60.8  |
| <i>DR3/DRB1*04:05</i>  | 0 (0.0%)                        | 0 (0.0%)    | 134 (100.0%) | 0.0                  | 100.0 |
| <i>DR3/DRB1*04:06</i>  | 0 (0.0%)                        | 1 (100.0%)  | 0 (0.0%)     | 50.0                 | 50.0  |
| <i>DR3/DRB1*04:07</i>  | 0 (0.0%)                        | 33 (68.8%)  | 15 (31.2%)   | 34.4                 | 65.6  |
| <i>DR3/DRB1*04:08</i>  | 0 (0.0%)                        | 1 (4.8%)    | 20 (95.2%)   | 2.4                  | 97.6  |
| <i>DR3/DRB1*04:10</i>  | 0 (0.0%)                        | 0 (0.0%)    | 1 (100.0%)   | 0.0                  | 100.0 |

**Supplementary Table 6.** Association of the *BTNL2* rs3763305 genotype with HLA *DRB1\*04* subtype alleles in children with the HLA *DR3/DR4-DQ8* genotype from the Bavarian diabetes registry DiMelli

| <i>DRB1*04</i> subtype | <i>BTNL2</i> rs3763305 genotype |            |             |
|------------------------|---------------------------------|------------|-------------|
|                        | AA                              | AG         | GG          |
| <i>DR3/DRB1*04:01</i>  | 0 (0.0%)                        | 0 (0.0%)   | 89 (100.0%) |
| <i>DR3/DRB1*04:02</i>  | 0 (0.0%)                        | 0 (0.0%)   | 21 (100.0%) |
| <i>DR3/DRB1*04:04</i>  | 0 (0.0%)                        | 18 (75.0%) | 6 (25.0%)   |
| <i>DR3/DRB1*04:05</i>  | 0 (0.0%)                        | 0 (0.0%)   | 7 (100.0%)  |

**Supplementary Table 7.** Cox proportional hazards models for developing one or more islet autoantibodies, multiple islet autoantibodies and diabetes according to *BTNL2* rs3763305 in children with the HLA *DR3/DRB1\*0404-DQ8* or HLA *DRB1\*0404-DQ8/DRB1\*0404-DQ8* genotypes adjusted for the HLA *DR3/DR4-DQ8* genotype

|                             | One or more islet autoantibodies |                 | Multiple islet autoantibodies |                 | Diabetes            |                 |
|-----------------------------|----------------------------------|-----------------|-------------------------------|-----------------|---------------------|-----------------|
|                             | HR                               | <i>P</i> -value | HR                            | <i>P</i> -value | HR                  | <i>P</i> -value |
|                             | (95% CI)                         |                 | (95% CI)                      |                 | (95% CI)            |                 |
| HLA <i>DR3/DR4-DQ8</i> *    | 1.48<br>(0.81–2.70)              | 0.20            | 1.64<br>(0.70–3.82)           | 0.25            | 1.26<br>(0.44–3.59) | 0.66            |
| <i>BTNL2</i> rs3763305 GG † | 1.13<br>(0.74–1.74)              | 0.57            | 1.49<br>(0.88–2.54)           | 0.14            | 2.38<br>(1.25–4.55) | 0.0086          |

\* Reference: *DR4-DQ8/DR4-DQ8*; † reference: GA/AA genotype



SUPPLEMENTARY DATA

**Supplementary Table 8.** Cumulative risk of developing islet autoantibodies or diabetes by 6 years old in children stratified by genetic risk score and HLA *DRB1\*04* subtype

| Risk strata                                                                                                           | One or more islet autoantibodies |              | Multiple islet autoantibodies |              | Diabetes    |              |
|-----------------------------------------------------------------------------------------------------------------------|----------------------------------|--------------|-------------------------------|--------------|-------------|--------------|
|                                                                                                                       | GP children                      | FDR children | GP children                   | FDR children | GP children | FDR children |
| 1: High-risk <i>DR4</i> * AND 1 <sup>st</sup> quartile GRS                                                            | 17.4%                            | 16.7%        | 12.7%                         | 14.3%        | 4.1%        | 4.8%         |
|                                                                                                                       | (13.6–21.2%)                     | (7.9–24.6%)  | (9.3–16.0%)                   | (6.1–21.9%)  | (2.2–5.9%)  | (0.1–9.2%)   |
| 2: High-risk <i>DR4</i> AND 2 <sup>nd</sup> quartile GRS OR<br>low-risk <i>DR4</i> * AND 1 <sup>st</sup> quartile GRS | 11.9%                            | 23.4%        | 9.0%                          | 17.0%        | 4.1%        | 9.1%         |
|                                                                                                                       | (9.6–14.1%)                      | (14.7–31.2%) | (7.0–10.9%)                   | (9.3–24.1%)  | (2.8–5.3%)  | (3.5–14.3%)  |
| 3: High-risk <i>DR4</i> AND GRS <50 <sup>th</sup> centile<br>OR low-risk <i>DR4</i> AND 2 <sup>nd</sup> quartile GRS  | 8.2%                             | 19.3%        | 4.5%                          | 14.8%        | 1.5%        | 7.1%         |
|                                                                                                                       | (6.7–9.7%)                       | (12.2–25.9%) | (3.3–5.7%)                    | (8.4–20.7%)  | (0.9–2.2%)  | (2.8–11.2%)  |
| 4: Low-risk <i>DR4</i> AND GRS <50 <sup>th</sup> centile                                                              | 4.3%                             | 11.1%        | 1.6%                          | 9.2%         | 0.5%        | 1.6%         |
|                                                                                                                       | (2.9–5.5%)                       | (2.3–19.1%)  | (0.8–2.4%)                    | (1.2–16.6%)  | (0.1–0.9%)  | (0.0–4.8%)   |
| <i>P</i> -value †                                                                                                     | <0.0001                          | 0.45         | <0.0001                       | 0.60         | <0.0001     | 0.18         |

\* High-risk *DR4* was defined as *DR3/DRB1\*0401* or *DRB1\*0401-DQ8/DR4* without 0404 or 0407, and low risk were all other genotypes; † *P*-values were calculated as log-rank tests per column over the four strata. GRS, genetic risk score

SUPPLEMENTARY DATA

**Supplementary Table 9.** Hazard ratios (HRs) and 95% CIs for developing one or more islet autoantibodies, multiple islet autoantibodies and diabetes in FDR children (FDR mother vs FDR father vs FDR sibling vs FDR multiplex), adjusted for sex, genetic factors (reference: *DR4-DQ8/DR4-DQ8*), and country (reference US)

|                               | One or more islet autoantibodies |         | Multiple islet autoantibodies |         | Diabetes             |         |
|-------------------------------|----------------------------------|---------|-------------------------------|---------|----------------------|---------|
|                               | HR (95% CI)                      | p-value | HR (95% CI)                   | p-value | HR (95% CI)          | p-value |
| FDR multiplex                 | 1.94<br>(0.62–6.12)              | 0.26    | 3.37<br>(1.06–10.66)          | 0.039   | 5.90<br>(1.84–18.94) | 0.0029  |
| FDR mother                    | 0.85<br>(0.50–1.44)              | 0.54    | 0.97<br>(0.52–1.79)           | 0.91    | 1.39<br>(0.67–2.87)  | 0.38    |
| FDR father                    | 2.37<br>(1.71–3.28)              | <0.0001 | 2.89<br>(2.00–4.17)           | <0.0001 | 3.06<br>(1.89–4.94)  | <0.0001 |
| FDR sibling                   | 2.68<br>(1.70–4.22)              | <0.0001 | 3.41<br>(2.07–5.62)           | <0.0001 | 5.15<br>(2.94–9.03)  | <0.0001 |
| <i>DRB1*04:01/x</i> *         | 1.44<br>(1.11–1.86)              | 0.0057  | 1.49<br>(1.09–2.04)           | 0.012   | 1.40<br>(0.94–2.07)  | 0.096   |
| Genetic risk score †          | 1.49<br>(1.35–1.65)              | <0.0001 | 1.68<br>(1.48–1.90)           | <0.0001 | 1.68<br>(1.43–1.98)  | <0.0001 |
| <i>BTNL2</i> rs3763305 GG ‡   | 1.02<br>(0.77–1.36)              | 0.88    | 1.34<br>(0.93–1.94)           | 0.12    | 1.74<br>(1.07–2.84)  | 0.026   |
| <i>ITGA1</i> rs7735139 "GG" ‡ | 1.25<br>(0.91–1.73)              | 0.17    | 1.14<br>(0.76–1.72)           | 0.52    | 1.21<br>(0.72–2.03)  | 0.47    |

\* Reference: *DRB1* without 0401 or 0401/0404 and 0401/0407; † per unit increase; ‡ reference: GA/AA genotype

## SUPPLEMENTARY DATA

### Supplemental Acknowledgements

#### The TEDDY Study Group

**Colorado Clinical Center:** Marian Rewers, M.D., Ph.D., PI<sup>1,4,5,6,10,11</sup>, Kimberly Bautista<sup>12</sup>, Judith Baxter<sup>9,10,12,15</sup>, Daniel Felipe-Morales, Kimberly Driscoll, Ph.D.<sup>9</sup>, Brigitte I. Frohnert, M.D.<sup>2,14</sup>, Marisa Gallant, M.D.<sup>13</sup>, Patricia Gesualdo<sup>2,6,12,14,15</sup>, Michelle Hoffman<sup>12,13,14</sup>, Rachel Karban<sup>12</sup>, Edwin Liu, M.D.<sup>13</sup>, Jill Norris, Ph.D.<sup>2,3,12</sup>, Adela Samper-Imaz, Andrea Steck, M.D.<sup>3,14</sup>, Kathleen Waugh<sup>6,7,12,15</sup>, Hali Wright<sup>12</sup>. University of Colorado, Anschutz Medical Campus, Barbara Davis Center for Childhood Diabetes.

**Finland Clinical Center:** Jorma Toppari, M.D., Ph.D., PI<sup>¥^1,4,11,14</sup>, Olli G. Simell, M.D., Ph.D., Annika Adamsson, Ph.D.<sup>^12</sup>, Suvi Ahonen<sup>\*±§</sup>, Heikki Hyöty, M.D., Ph.D.<sup>\*±6</sup>, Jorma Ilonen, M.D., Ph.D.<sup>¥¶3</sup>, Sanna Jokipuu<sup>^</sup>, Leena Karlsson<sup>^</sup>, Miia Kähönen<sup>μπ</sup>, Mikael Knip, M.D., Ph.D.<sup>\*±5</sup>, Mirva Koreasalo<sup>\*±§2</sup>, Kalle Kurppa, M.D., Ph.D.<sup>\*±13</sup>, Tiina Latva-aho<sup>μπ</sup>, Maria Lönnrot, M.D., Ph.D.<sup>\*±6</sup>, Markus Mattila<sup>\*</sup>, Elina Mäntymäki<sup>^</sup>, Katja Multasuo<sup>μπ</sup>, Tiina Niininen<sup>\*±12</sup>, Sari Niinistö<sup>±§2</sup>, Mia Nyblom<sup>\*±</sup>, Paula Ollikainen<sup>μπ</sup>, Petra Rajala<sup>^</sup>, Jenna Rautanen<sup>±§</sup>, Anne Riikonen<sup>\*±§</sup>, Minna Romo<sup>^</sup>, Suvi Ruohonen<sup>^</sup>, Juulia Rönkä<sup>μπ</sup>, Satu Simell, M.D., Ph.D.<sup>¥13</sup>, Tuula Simell, Ph.D.<sup>¥12</sup>, Maija Sjöberg<sup>¥^12,14</sup>, Aino Stenius<sup>μπ12</sup>, Sini Vainionpää<sup>^</sup>, Eeva Varjonen<sup>¥^12</sup>, Riitta Veijola, M.D., Ph.D.<sup>μπ14</sup>, Suvi M. Virtanen, M.D., Ph.D.<sup>\*±§2</sup>, Mari Vähä-Mäkilä<sup>^</sup>, Mari Åkerlund<sup>\*±§</sup>, Katri Lindfors, Ph.D.<sup>\*13</sup> ¥University of Turku, \*University of Tampere, μUniversity of Oulu, ^Turku University Hospital, Hospital District of Southwest Finland, ±Tampere University Hospital, πOulu University Hospital, §National Institute for Health and Welfare, Finland, ¥University of Kuopio.

**Georgia/Florida Clinical Center:** Jin-Xiong She, Ph.D., PI<sup>1,3,4,11</sup>, Desmond Schatz, M.D.<sup>\*4,5,7,8</sup>, Diane Hopkins<sup>12</sup>, Leigh Steed<sup>12,13,14,15</sup>, Jennifer Bryant, Janey Adams<sup>\*12</sup>, Katherine Silvis<sup>2</sup>, Michael Haller, M.D.<sup>\*14</sup>, Melissa Gardiner, Richard McIndoe, Ph.D., Ashok Sharma, Stephen W. Anderson, M.D.<sup>^</sup>, Laura Jacobsen, M.D.<sup>\*14</sup>, John Marks, DHSc.<sup>\*</sup>, P.D. Towe<sup>\*</sup>. Center for Biotechnology and Genomic Medicine, Augusta University. \*University of Florida, ^Pediatric Endocrine Associates, Atlanta.

**Germany Clinical Center:** Anette-G. Ziegler, M.D., PI<sup>1,3,4,11</sup>, Andreas Beyerlein, Ph.D.<sup>2</sup>, Ezio Bonifacio Ph.D.<sup>\*5</sup>, Anita Gavrisan, Cigdem Gezginci, Anja Heublein, Michael Hummel, M.D.<sup>13</sup>, Sandra Hummel, Ph.D.<sup>2</sup>, Annette Knopff<sup>7</sup>, Charlotte Koch, Sibylle Koletzko, M.D.<sup>¶13</sup>, Claudia Ramminger, Roswith Roth, Ph.D.<sup>9</sup>, Marlon Scholz, Joanna Stock<sup>9,12,14</sup>, Katharina Warncke, M.D.<sup>14</sup>, Lorena Wendel, Christiane Winkler, Ph.D.<sup>2,12,15</sup>. Forschergruppe Diabetes e.V. and Institute of Diabetes Research, Helmholtz Zentrum München, Forschergruppe Diabetes, Technische Universität München. \*Center for Regenerative Therapies, TU Dresden, ¶Dr. von Hauner Children's Hospital, Department of Gastroenterology, Ludwig Maximilians University Munich.

**Sweden Clinical Center:** Åke Lernmark, Ph.D., PI<sup>1,3,4,5,6,8,10,11,15</sup>, Daniel Agardh, M.D., Ph.D.<sup>13</sup>, Carin Andrés Aronsson, Ph.D.<sup>2,12,13</sup>, Maria Ask, Jenny Bremer, Ulla-Marie Carlsson, Corrado Cilio, Ph.D., M.D.<sup>5</sup>, Emelie Ericson-Hallström, Annika Fors, Lina Fransson, Thomas Gard, Rasmus Bennet, Carina Hansson, Susanne Hyberg, Hanna Jisser, Fredrik Johansen, Berglind Jonsdottir, M.D., Ph.D., Silvija Jovic, Helena Elding Larsson, M.D., Ph.D.<sup>6,14</sup>, Marielle Lindström, Markus Lundgren, M.D., Ph.D.<sup>14</sup>, Maria Månsson-Martinez, Maria Markan, Jessica Melin<sup>12</sup>, Zeliha Mestan, Caroline Nilsson, Karin Ottosson, Kobra Rahmati, Anita Ramelius, Falastin Salami, Sara Sibthorpe, Anette Sjöberg, Birgitta Sjöberg, Carina Törn, Ph.D.<sup>3,15</sup>, Anne Wallin, Åsa Wimar<sup>14</sup>, Sofie Åberg. Lund University.

**Washington Clinical Center:** William A. Hagopian, M.D., Ph.D., PI<sup>1,3,4,5,6,7,11,13,14</sup>, Michael Killian<sup>6,7,12,13</sup>, Claire Cowen Crouch<sup>12,14,15</sup>, Jennifer Skidmore<sup>2</sup>, Ashley Akramoff, Jana Banjanin, Masumeh Chavoshi, Kayleen Dunson, Rachel Hervey, Rachel Lyons, Arlene Meyer, Denise Mulenga, Jared Radtke, Davey Schmitt, Julie Schwabe, Sarah Zink. Pacific Northwest Research Institute.

**Pennsylvania Satellite Center:** Dorothy Becker, M.D., Margaret Franciscus, MaryEllen Dalmagro-Elias Smith<sup>2</sup>, Ashi Daftary, M.D., Mary Beth Klein, Chrystal Yates. Children's Hospital of Pittsburgh of UPMC.

**Data Coordinating Center:** Jeffrey P. Krischer, Ph.D., PI<sup>1,4,5,10,11</sup>, Sarah Austin-Gonzalez, Maryouri Avendano, Sandra Baethke, Rasheedah Brown<sup>12,15</sup>, Brant Burkhardt, Ph.D.<sup>5,6</sup>, Martha Butterworth<sup>2</sup>, Joanna Clasen, David Cuthbertson, Christopher Eberhard, Steven Fiske<sup>9</sup>, Dena Garcia, Jennifer Garmeson, Veena Gowda, Kathleen Heyman, Belinda Hsiao, Francisco Perez Laras, Hye-Seung Lee, Ph.D.<sup>1,2,13,15</sup>, Shu Liu, Xiang Liu, Ph.D.<sup>2,3,9,14</sup>, Kristian Lynch, Ph.D.<sup>5,6,9,15</sup>, Colleen Maguire, Jamie Malloy, Cristina McCarthy<sup>12,15</sup>, Aubrie Merrell, Steven Meulemans, Hemang Parikh, Ph.D.<sup>3</sup>, Ryan Quigley, Cassandra Remedios, Chris Shaffer, Laura Smith, Ph.D.<sup>9,12</sup>, Susan Smith<sup>12,15</sup>, Noah Sulman, Ph.D., Roy Tamura, Ph.D.<sup>1,2,13</sup>, Ulla Uusitalo, Ph.D.<sup>2,15</sup>, Kendra Vehik,

## SUPPLEMENTARY DATA

Ph.D.<sup>4,5,6,14,15</sup>, Ponni Vijayakandipan, Keith Wood, Jimin Yang, Ph.D., R.D.<sup>2,15</sup>. *Past staff: Michael Abbondandolo, Lori Ballard, David Hadley, Ph.D., Wendy McLeod.* University of South Florida.

**Project scientist:** Beena Akolkar, Ph.D.<sup>1,3,4,5,6,7,10,11</sup>. National Institutes of Diabetes and Digestive and Kidney Diseases.

**Other contributors:** Kasia Bourcier, Ph.D.<sup>5</sup>, National Institutes of Allergy and Infectious Diseases. Thomas Briese, Ph.D.<sup>6,15</sup>, Columbia University. Suzanne Bennett Johnson, Ph.D.<sup>9,12</sup>, Florida State University. Eric Triplett, Ph.D.<sup>6</sup>, University of Florida.

**Autoantibody Reference Laboratories:** Liping Yu, M.D.<sup>5</sup>, Dongmei Miao, M.D.<sup>5</sup>, Polly Bingley, M.D., FRCP<sup>5</sup>, Alistair Williams\*, Kyla Chandler\*, Olivia Ball\*, Ilana Kelland\*, Sian Grace\*, Ben Gillard\*. <sup>5</sup>Barbara Davis Center for Childhood Diabetes, University of Colorado Denver, \*Bristol Medical School, University of Bristol UK.

**HLA Reference Laboratory:** William Hagopian<sup>3</sup>, MD, PhD, Masumeh Chavoshi, Jared Radtke, Julie Schwabe. Pacific Northwest Research Institute, Seattle WA. (Previously Henry Erlich, Ph.D.<sup>3</sup>, Steven J. Mack, Ph.D., Anna Lisa Fear. Center for Genetics, Children's Hospital Oakland Research Institute.)

**SNP Laboratory:** Stephen S. Rich, Ph.D.<sup>3</sup>, Wei-Min Chen, Ph.D.<sup>3</sup>, Suna Onengut-Gumuscu, Ph.D.<sup>3</sup>, Emily Farber, Rebecca Roche Pickin, Ph.D., Jonathan Davis, Jordan Davis, Dan Gallo, Jessica Bonnie, Paul Campolieto. Center for Public Health Genomics, University of Virginia.

**Repository:** Sandra Ke, Niveen Mulholland, Ph.D. NIDDK Biosample Repository at Fisher BioServices.

**Committees:** <sup>1</sup>Ancillary Studies, <sup>2</sup>Diet, <sup>3</sup>Genetics, <sup>4</sup>Human Subjects/Publicity/Publications, <sup>5</sup>Immune Markers, <sup>6</sup>Infectious Agents, <sup>7</sup>Laboratory Implementation, <sup>8</sup>Maternal Studies, <sup>9</sup>Psychosocial, <sup>10</sup>Quality Assurance, <sup>11</sup>Steering, <sup>12</sup>Study Coordinators, <sup>13</sup>Celiac Disease, <sup>14</sup>Clinical Implementation, <sup>15</sup>Quality Assurance Subcommittee on Data Quality.

### Supplemental References

1. Troegeler A, Lastrucci C, Duval C, Tanne A, Cougoule C, Maridonnoeu-Parini I, Neyrolles O, Lugo-Villarino G: An efficient siRNA-mediated gene silencing in primary human monocytes, dendritic cells and macrophages. *Immunol Cell Biol* 2014;92:699-708
2. Barker JM, Triolo TM, Aly TA, Baschal EE, Babu SR, Kretowski A, Rewers MJ, Eisenbarth GS: Two single nucleotide polymorphisms identify the highest-risk diabetes HLA genotype: potential for rapid screening. *Diabetes* 2008;57:3152-3155
3. The Genomes Project C, Auton A, Abecasis GR, Altshuler DM, Durbin RM, Abecasis GR, Bentley DR, Chakravarti A, Clark AG, Donnelly P, Eichler EE, Flicek P, Gabriel SB, Gibbs RA, Green ED, Hurles ME, Knoppers BM, Korbel JO, Lander ES, Lee C, Lehrach H, Mardis ER, Marth GT, McVean GA, Nickerson DA, Schmidt JP, Sherry ST, Wang J, Wilson RK, Gibbs RA, Boerwinkle E, Doddapaneni H, Han Y, Korchina V, Kovar C, Lee S, Muzny D, Reid JG, Zhu Y, Wang J, Chang Y, Feng Q, Fang X, Guo X, Jian M, Jiang H, Jin X, Lan T, Li G, Li J, Li Y, Liu S, Liu X, Lu Y, Ma X, Tang M, Wang B, Wang G, Wu H, Wu R, Xu X, Yin Y, Zhang D, Zhang W, Zhao J, Zhao M, Zheng X, Lander ES, Altshuler DM, Gabriel SB, Gupta N, Gharani N, Toji LH, Gerry NP, Resch AM, Flicek P, Barker J, Clarke L, Gil L, Hunt SE, Kelman G, Kulesha E, Leinonen R, McLaren WM, Radhakrishnan R, Roa A, Smirnov D, Smith RE, Streeter I, Thormann A, Toneva I, Vaughan B, Zheng-Bradley X, Bentley DR, Grocock R, Humphray S, James T, Kingsbury Z, Lehrach H, Sudbrak R, Albrecht MW, Amstislavskiy VS, Borodina TA, Lienhard M, Mertes F, Sultan M, Timmermann B, Yaspo M-L, Mardis ER, Wilson RK, Fulton L, Fulton R, Sherry ST, Ananiev V, Belaia Z, Beloslyudtsev D, Bouk N, Chen C, Church D, Cohen R, Cook C, Garner J, Hefferon T, Kimelman M, Liu C, Lopez J, Meric P, O'Sullivan C, Ostapchuk Y, Phan L, Ponomarov S, Schneider V, Shekhtman E, Sirotkin K, Slotta D, Zhang H, McVean GA, Durbin RM, Balasubramaniam S, Burton J, Danecek P, Keane TM, Kolb-Kokocinski A, McCarthy S, Stalker J, Quail M, Schmidt JP, Davies CJ, Gollub J, Webster T, Wong B, Zhan Y, Auton A, Campbell CL, Kong Y, Marcketta A, Gibbs RA, Yu F, Antunes L, Bainbridge M, Muzny D, Sabo A, Huang Z, Wang J, Coin LJM, Fang L, Guo X, Jin X, Li G, Li Q, Li Y, Li Z, Lin H, Liu B, Luo R, Shao H, Xie Y, Ye C, Yu C, Zhang F, Zheng H, Zhu H, Alkan C, Dal E, Kahveci F, Marth GT, Garrison EP, Kural D, Lee W-P, Fung Leong W, Stromberg M, Ward AN, Wu J, Zhang M, Daly MJ, DePristo MA, Handsaker RE, Altshuler DM, Banks E, Bhatia G, del Angel G, Gabriel SB, Genovese G, Gupta N, Li H, Kashin S, Lander ES, McCarroll SA, Nemesh JC, Poplin RE, Yoon SC, Lihm J, Makarov V, Clark AG, Gottipati S, Keinan A, Rodriguez-Flores JL, Korbel JO, Rausch T, Fritz MH, Stütz AM,

## SUPPLEMENTARY DATA

Flicek P, Beal K, Clarke L, Datta A, Herrero J, McLaren WM, Ritchie GRS, Smith RE, Zerbino D, Zheng-Bradley X, Sabeti PC, Shlyakhter I, Schaffner SF, Vitti J, Cooper DN, Ball EV, Stenson PD, Bentley DR, Barnes B, Bauer M, Keira Cheetham R, Cox A, Eberle M, Humphray S, Kahn S, Murray L, Peden J, Shaw R, Kenny EE, Batzer MA, Konkel MK, Walker JA, MacArthur DG, Lek M, Sudbrak R, Amstislavskiy VS, Herwig R, Mardis ER, Ding L, Koboldt DC, Larson D, Ye K, Gravel S, Swaroop A, Chew E, Lappalainen T, Erlich Y, Gymrek M, Frederick Willems T, Simpson JT, Shriver MD, Rosenfeld JA, Bustamante CD, Montgomery SB, De La Vega FM, Byrnes JK, Carroll AW, DeGorter MK, Lacroute P, Maples BK, Martin AR, Moreno-Estrada A, Shringarpure SS, Zakharia F, Halperin E, Baran Y, Lee C, Cerveira E, Hwang J, Malhotra A, Plewczynski D, Radew K, Romanovitch M, Zhang C, Hyland FCL, Craig DW, Christoforides A, Homer N, Izatt T, Kurdoglu AA, Sinari SA, Squire K, Sherry ST, Xiao C, Sebat J, Antaki D, Gujral M, Noor A, Ye K, Burchard EG, Hernandez RD, Gignoux CR, Haussler D, Katzman SJ, James Kent W, Howie B, Ruiz-Linares A, Dermitzakis ET, Devine SE, Abecasis GR, Min Kang H, Kidd JM, Blackwell T, Caron S, Chen W, Emery S, Fritsche L, Fuchsberger C, Jun G, Li B, Lyons R, Scheller C, Sidore C, Song S, Sliwerska E, Taliun D, Tan A, Welch R, Kate Wing M, Zhan X, Awadalla P, Hodgkinson A, Li Y, Shi X, Quitadamo A, Lunter G, McVean GA, Marchini JL, Myers S, Churchhouse C, Delaneau O, Gupta-Hinch A, Kretzschmar W, Iqbal Z, Mathieson I, Menelaou A, Rimmer A, Xifara DK, Oleksyk TK, Fu Y, Liu X, Xiong M, Jorde L, Witherspoon D, Xing J, Eichler EE, Browning BL, Browning SR, Hormozdiari F, Sudmant PH, Khurana E, Durbin RM, Hurler ME, Tyler-Smith C, Albers CA, Ayub Q, Balasubramanian S, Chen Y, Colonna V, Danecek P, Jostins L, Keane TM, McCarthy S, Walter K, Xue Y, Gerstein MB, Abyzov A, Balasubramanian S, Chen J, Clarke D, Fu Y, Harmani AO, Jin M, Lee D, Liu J, Jasmine Mu X, Zhang J, Zhang Y, Li Y, Luo R, Zhu H, Alkan C, Dal E, Kahveci F, Marth GT, Garrison EP, Kural D, Lee W-P, Ward AN, Wu J, Zhang M, McCarroll SA, Handsaker RE, Altshuler DM, Banks E, del Angel G, Genovese G, Hartl C, Li H, Kashin S, Nemesh JC, Shakir K, Yoon SC, Lihm J, Makarov V, Degenhardt J, Korbel JO, Fritz MH, Meiers S, Raeder B, Rausch T, Stütz AM, Flicek P, Paolo Casale F, Clarke L, Smith RE, Stegle O, Zheng-Bradley X, Bentley DR, Barnes B, Keira Cheetham R, Eberle M, Humphray S, Kahn S, Murray L, Shaw R, Lameijer E-W, Batzer MA, Konkel MK, Walker JA, Ding L, Hall I, Ye K, Lacroute P, Lee C, Cerveira E, Malhotra A, Hwang J, Plewczynski D, Radew K, Romanovitch M, Zhang C, Craig DW, Homer N, Church D, Xiao C, Sebat J, Antaki D, Bafna V, Michaelson J, Ye K, Devine SE, Gardner EJ, Abecasis GR, Kidd JM, Mills RE, Dayama G, Emery S, Jun G, Shi X, Quitadamo A, Lunter G, McVean GA, Chen K, Fan X, Chong Z, Chen T, Witherspoon D, Xing J, Eichler EE, Chaisson MJ, Hormozdiari F, Huddleston J, Malig M, Nelson BJ, Sudmant PH, Parrish NF, Khurana E, Hurler ME, Blackburne B, Lindsay SJ, Ning Z, Walter K, Zhang Y, Gerstein MB, Abyzov A, Chen J, Clarke D, Lam H, Jasmine Mu X, Sisun C, Zhang J, Zhang Y, Gibbs RA, Yu F, Bainbridge M, Challis D, Evani US, Kovar C, Lu J, Muzny D, Nagaswamy U, Reid JG, Sabo A, Yu J, Guo X, Li W, Li Y, Wu R, Marth GT, Garrison EP, Fung Leong W, Ward AN, del Angel G, DePristo MA, Gabriel SB, Gupta N, Hartl C, Poplin RE, Clark AG, Rodriguez-Flores JL, Flicek P, Clarke L, Smith RE, Zheng-Bradley X, MacArthur DG, Mardis ER, Fulton R, Koboldt DC, Gravel S, Bustamante CD, Craig DW, Christoforides A, Homer N, Izatt T, Sherry ST, Xiao C, Dermitzakis ET, Abecasis GR, Min Kang H, McVean GA, Gerstein MB, Balasubramanian S, Habegger L, Yu H, Flicek P, Clarke L, Cunningham F, Dunham I, Zerbino D, Zheng-Bradley X, Lage K, Berg J, Jaspersen J, Horn H, Montgomery SB, DeGorter MK, Khurana E, Tyler-Smith C, Chen Y, Colonna V, Xue Y, Gerstein MB, Balasubramanian S, Fu Y, Kim D, Auton A, Marcketta A, Desalle R, Narechania A, Wilson Sayres MA, Garrison EP, Handsaker RE, Kashin S, McCarroll SA, Rodriguez-Flores JL, Flicek P, Clarke L, Zheng-Bradley X, Erlich Y, Gymrek M, Frederick Willems T, Bustamante CD, Mendez FL, David Poznik G, Underhill PA, Lee C, Cerveira E, Malhotra A, Romanovitch M, Zhang C, Abecasis GR, Coin L, Shao H, Mittelman D, Tyler-Smith C, Ayub Q, Banerjee R, Cerezo M, Chen Y, Fitzgerald TW, Louzada S, Massaia A, McCarthy S, Ritchie GR, Xue Y, Yang F, Gibbs RA, Kovar C, Kalra D, Hale W, Muzny D, Reid JG, Wang J, Dan X, Guo X, Li G, Li Y, Ye C, Zheng X, Altshuler DM, Flicek P, Clarke L, Zheng-Bradley X, Bentley DR, Cox A, Humphray S, Kahn S, Sudbrak R, Albrecht MW, Lienhard M, Larson D, Craig DW, Izatt T, Kurdoglu AA, Sherry ST, Xiao C, Haussler D, Abecasis GR, McVean GA, Durbin RM, Balasubramanian S, Keane TM, McCarthy S, Stalker J, Chakravarti A, Knoppers BM, Abecasis GR, Barnes KC, Beiswanger C, Burchard EG, Bustamante CD, Cai H, Cao H, Durbin RM, Gerry NP, Gharani N, Gibbs RA, Gignoux CR, Gravel S, Henn B, Jones D, Jorde L, Kaye JS, Keinan A, Kent A, Kerasidou A, Li Y, Mathias R, McVean GA, Moreno-Estrada A, Ossorio PN, Parker M, Resch AM, Rotimi CN, Royal CD, Sandoval K, Su Y, Sudbrak R, Tian Z, Tishkoff S, Toji LH, Tyler-Smith C, Via M, Wang Y, Yang H, Yang L, Zhu J, Bodmer W, Bedoya G, Ruiz-Linares A, Cai Z, Gao Y, Chu J, Peltonen L, Garcia-Montero A, Orfao A, Dutil J, Martinez-Cruzado JC, Oleksyk TK, Barnes KC, Mathias RA, Hennis A, Watson H, McKenzie C, Qadri F, LaRocque R, Sabeti PC, Zhu J, Deng X, Sabeti PC, Asogun D, Folarin O, Happi C, Omoniwa O, Stremlau M, Tariyal R, Jallow M, Sisay Joof F, Corrah T, Rockett K, Kwiatkowski D, Kooner J, Tinh Hiê'n Tn, Dunstan SJ, Thuy Hang N, Fannie R, Garry R, Kanneh L, Moses L, Sabeti PC, Schieffelin J, Grant DS, Gallo C, Poletti G, Saleheen D, Rasheed A, Brooks LD, Felsenfeld AL, McEwen JE, Vaydylevich Y, Green ED, Duncanson A, Dunn M, Schloss JA, Wang J, Yang H, Auton A, Brooks LD, Durbin RM, Garrison EP, Min Kang H, Korbel JO, Marchini JL, McCarthy S, McVean GA, Abecasis GR: A global reference for human genetic variation. *Nature* 2015;526:68
